# Supplementary material for: Characteristics of marine aerosols and cloud condensation nuclei measured during the cruise of R/V ISABU in 2024: from the East China Sea to the Indian Ocean
Source: Copernicus journal article supplement (doi:10.5194/egusphere-2026-842), 2026-02-24
Supplement: Supplementary file [file egusphere-2026-842-RC1-supplement.pdf]

This is a well-written manuscript of an important topic that deserves publication after some minor modifications.

Can you make any statements about cloudiness within the various areas? This would relate to the accumulation mode. Perhaps it was more cloudy in the Indian Ocean since there was more precipitation.

L37-8. Include concentration.

Fig. 2. Is there a significance to the white strip at 15° N latitude?

L196. Insert ship before plume stack. Delete relatively.

L234. Insert The before hygroscopicity.

L291. Remove r from larger.

L293. Remove in.

L302. Change distribution to concentration.

Fig. 4a. Explain gaps.

Fig. 4b. Reverse the legend order for  $N_{CCN}$ . 1% should be closest to  $N_{CN}$ .

Fig. 5. Explain  $N_{CN15}$ . Apparently means all particles larger than 15  $\mu\text{m}$ .

L323. Insert total before aerosol.

L415. Insert than the Strait of Malacca after Sea.

L417-8. Need explanation.

L422. Change These to Those.

Fig. 8. These types of plots require explanation. What is the horizontal line within each box? Probably a median but for just the box or all data. What range do the boxes include, perhaps standard deviation. What range do the extreme lines represent, perhaps 90% of data. What do the out of box data represent? Label nucleation, Aitken and accumulation.

L457. Insert only before in.

L483. Change increase to are greater.

L489. Remove the. Change for each sea area decreased with increasing to is smaller for higher. This is true regardless of sea area.

L507. Remove that.

Figure 11 is difficult to read. Log scale for vertical would help. The star symbol in the legend is much smaller than within the figure. Please enlarge to same size so it is readable.

L517-18. Move Fig. 12 to beginning of sentence.

L517. Change The to shows. Delete are shown. Change together to along. Remove those. Change fitted to fittings. Remove a.

L518. Remove as shown in. Add e to 1<sup>st</sup> formula (plural). Period after formulae. Insert The before Twomey.

L519. Change was used as to is.

L521. Change the to These.

L519-21. Move a three parameter formula to the beginning of sentence.

L520. Insert was before proposed.

L521. Remove was used as. Change The to These.

L522. Change the to these. Fitting plural.

L538. Period after supersaturation. Change and to  $\beta$ .

L539. Remove A. Add s to respond. Delete small changes in. Insert variations after supersaturation.

L540. Particularly to especially.

L545. Change compared to to than in.

L547. Change fluctuations to differences.

L549. Delete In the case of. Capitalize the before Indian. Change when compared with to mean CCN spectra of this study are similar to some of the. Remove conducted.

L549-50. Move CCN in front of measurements.

L550. Remove below the BL (this would be submarine). Move 1999 in front of INDOEX. Delete in.

L550-1. Move parenthetical phrase right after campaign. Remove spectra in this study were similar to those. Period after parenthetical.

L551. (new sentence). These were classified as 'Clean' at low altitudes south of the ITCZ over the Indian Ocean.

L552. Change the to these.

L553. Change last ocean to area.

Table 1. Add a column for mean  $N_{CN}$ .

L562. Move during the cruise to beginning of sentence. Move air mass origins in front of even. Delete the. Delete of. Period after differ.

L562-3. Change which in turn may lead to to Such. Change in to could affect.

L565. Change were to are.

L566. Change classified to divided.

L567-8. Insert the after to. Move relatively low altitudes right after the. Insert of before Cluster. Remove which remained at.

L568. Change exceeding to above.

L575-6. Probably sea salt, NaCl.

L577. Insert also after were.

L579. Change those to air.

L580. Remove the. Remove of. Move characteristics after CCN. Aerosol singular.

L592. Cluster plural. Change the to all. Delete somewhat.

L593. Add they were still much lower than cluster 2.

L594. Insert only after into.

L599-601. Just because  $N_{CN}$  is higher does not necessarily mean  $N_{CCN}$  is higher.

L608. Insert brief before occurrence.

L609. Insert mean before  $N_{CN}$ .

L612. Insert only in front of from.

Table 2. Insert Mean in front of aerosol.

L634. Change combined to applied.

L636. Insert total before aerosol.

L639. Move a meteorological factor in front of intense precipitation. Comma after factor.

L642. Change comma to period. Delete and. Capitalize it.

L643. Change were to was. Change those to  $N_{CCN}$ .

L647. Delete 2<sup>nd</sup> the. Change in to over.

L656. Delete 2<sup>nd</sup> the.

L659. Diameters singular.

L661. Insert more before substantial. Change last the to a. supersaturations singular.

L665. Change particularly to especially.

L665-7. CCN supersaturation accounts for all of these factors. Could point out that all of these factors influence CCN supersaturation.

L668. Change In the to Regarding.  
L672. Insert more after be. Move variations after aerosol (singular). Delete in.  
L673-4. Move substantially larger in front of  $\beta$ . Move in the South China Sea right after  $\beta$ .  
Change reflecting to reflected. Delete was. Change comma to period.  
L675. Insert This is before consistent.  
L675-6. Change that region to the South China Sea.  
L677. Remove The.  
L678-80. Note sea salt, NaCl.

#### Supplement

L41. Particularly to especially.  
L43. Comparison plural.  
L61. Remove in.  
L62. Move except the first in front of were.  
L94. Delete to.  
L96. Word missing after where.  
L98. Do you mean beginning of the hour?  
L107. Change in to within.  
Fig. S1. How do a & b relate? They have the same times but different plots. I do not see dashed lines. No legend in a.  
Fig. S3. What does white line at 4°N signify?  
Fig. S4. Pink lines?  
Fig. S6. Pink lines?  
Fig. S8. Pink lines?
